# Supplementary material for: An alternative electrochemical approach for toluene detection with ZnO/MgO/Cr2O3 nanofibers on a glassy carbon electrode for environmental monitoring
Source: Royal Society of Chemistry journal article supplement (doi:10.1039/d0ra08577d), 2020-01-01
Supplement: d0ra08577d1.pdf [file d0ra08577d1.pdf]

### Supporting information

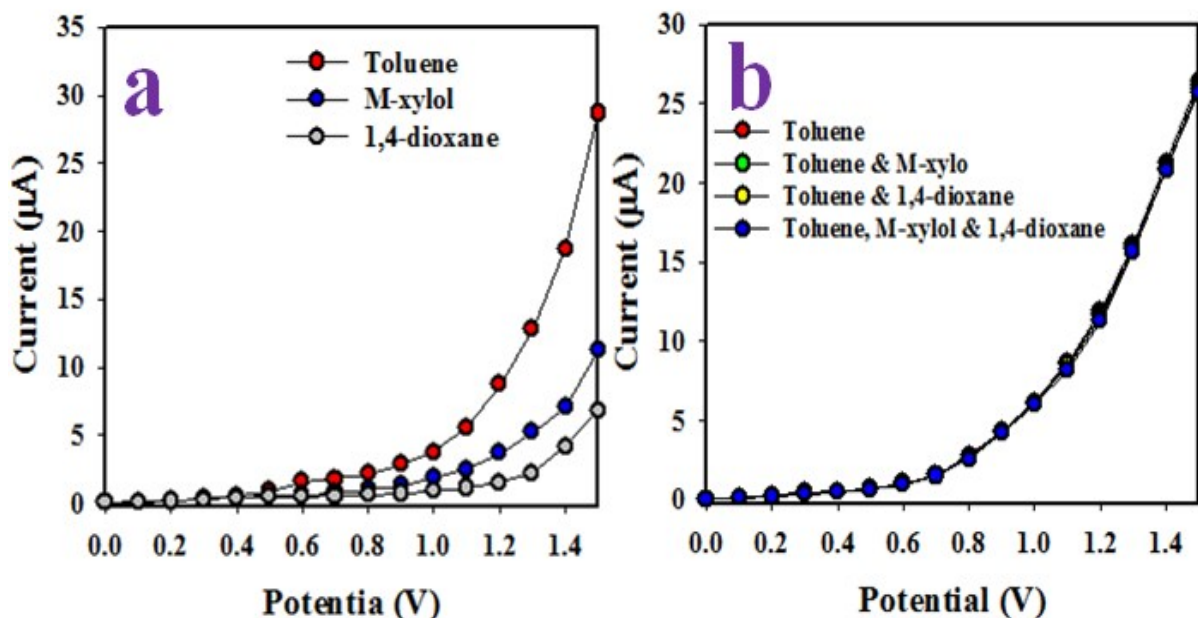

**Fig. S1.** Optimization of sensor. (a) Comparison studies between electrochemical responses of toluene, M-xylol, and 1,4-dioxane compounds based on ZnO/MgO/Cr<sub>2</sub>O<sub>3</sub> NFs/nafion/GCE sensor probe, (b) Interference effect in electrochemical response of toluene chemical sensor.

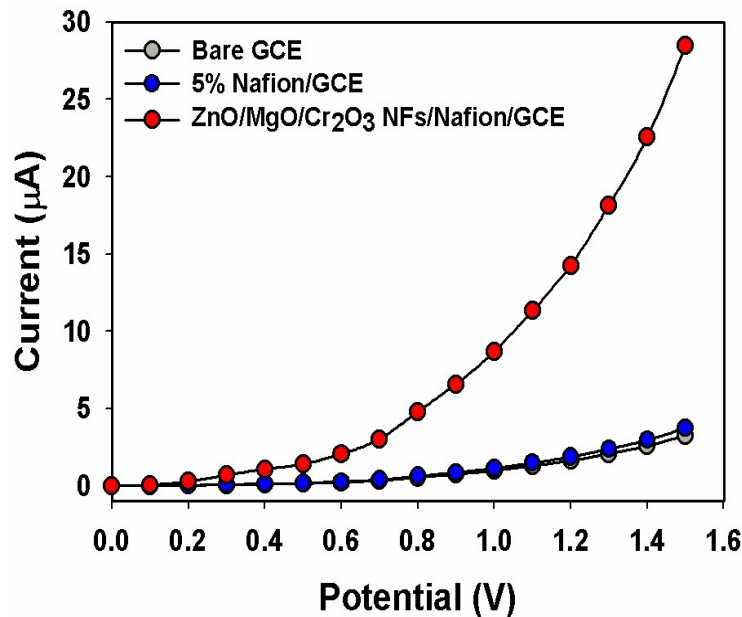

**Fig. S2.** Control experiment with various electrode modification (Bare GCE, Nafion/GCE and ZnO/MgO/Cr<sub>2</sub>O<sub>3</sub> NFs/Nafion/GCE) in the identical conditions. Analytes concentration 0.1 μM; Potential range: 0 to 1.5 V

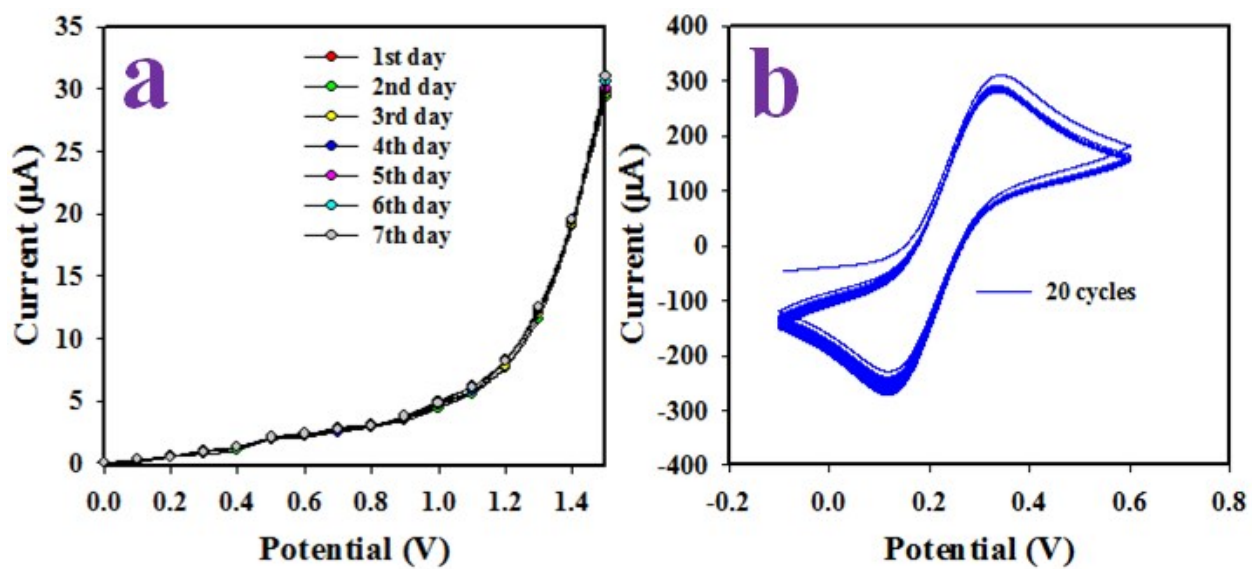

**Fig. S3.** Reliability and stability of the ZnO/MgO/Cr<sub>2</sub>O<sub>3</sub> NFs/Nafion/GCE sensor probe. (a) I-V responses with the same modified electrode in different days for reliability study and (b) Voltammograms (20 cycles) of the fabricated electrode in the ferrocyanide couple for stability study.
